# Supplementary material for: Eating Disorder Neuroimaging Initiative (EDNI): a multicentre prospective cohort study protocol for elucidating the neural effects of cognitive–behavioural therapy for eating disorders
Source: HighWire-hosted journal article supplement (doi:10.1136/bmjopen-2020-042685), 2021-01-01
Supplement: bmjopen-2020-042685supp001_data_supplement.pdf [file bmjopen-2020-042685supp001_data_supplement.pdf]

Supplemental table. Non-specific psychological indicators of secondary outcome

| Name of psychological indicators                                              | Content                                                                                                                                                                                                | Item questionnaire |                      | Score range |         |
|-------------------------------------------------------------------------------|--------------------------------------------------------------------------------------------------------------------------------------------------------------------------------------------------------|--------------------|----------------------|-------------|---------|
|                                                                               |                                                                                                                                                                                                        |                    |                      | Minimum     | Maximum |
| <i>Semi-structured interview</i>                                              |                                                                                                                                                                                                        |                    |                      |             |         |
| The Mini-International Neuropsychiatric Interview (M.I.N.I.) <sup>43,44</sup> | M.I.N.I. is a brief diagnostic interview that follows DSM-IV compliant criteria for general mental status.                                                                                             | -                  | -                    | -           | -       |
| Japanese Adult Reading Test (JART) <sup>45,46</sup>                           | JART estimates the premorbid intellectual ability by assessing the ability of reading Chinese characters.                                                                                              | 25                 | -                    | 69          | 120     |
| <i>Self-administered questionnaire</i>                                        |                                                                                                                                                                                                        |                    |                      |             |         |
| Beck Depression Inventory-Second Edition (BDI-II) <sup>47,48</sup>            | BDI-II is used to assess the severity of depression. A higher score represents a more severe level of depression.                                                                                      | 21                 | 4-point Likert scale | 0           | 63      |
| State-Trait Anxiety Inventory (STAI) <sup>49,50</sup>                         | STAI evaluates state and trait anxiety. A higher score indicates a higher level of anxiety.                                                                                                            | 40                 | 4-point Likert scale | 0           | 60      |
| NEO Five-Factor Inventory (NEO-FFI) <sup>51,52</sup>                          | NEO FFI is a personality inventory that examines a person's Big Five personality traits (Neuroticism, Extraversion, Openness, Agreeableness, and Conscientiousness).                                   | 60                 | 5-point Likert scale | 0           | 48      |
| Toronto Alexithymia Scale-20 (TAS-20) <sup>53,54</sup>                        | TAS-20 is aimed to evaluate alexithymia. It consists of three subscales (difficulty describing feelings subscale, difficulty identifying feeling subscale, and externally-oriented Thinking subscale). | 20                 | 5-point Likert scale | 20          | 100     |
| Adult version facial expression recognition test <sup>55</sup>                | This scale measures facial expression recognition ability for adults' face.                                                                                                                            | 32                 | 4-point Likert scale | 0           | 32      |
| Edinburgh handedness inventory <sup>56,57</sup>                               | To determine objectively whether one is left- or right-handed.                                                                                                                                         | 10                 | 5-point Likert scale | -100        | 100     |
| Childhood trauma questionnaire (CTQ) <sup>58,59</sup>                         | CTQ measures childhood trauma and it consists of five subscales (emotional abuse, physical abuse, sexual abuse,                                                                                        | 28                 | 5-point Likert scale | 28          | 140     |

|                                                                                 |                                                                                                                                                                                                                                                                 |    |                      |    |     |
|---------------------------------------------------------------------------------|-----------------------------------------------------------------------------------------------------------------------------------------------------------------------------------------------------------------------------------------------------------------|----|----------------------|----|-----|
|                                                                                 | emotional neglect, physical neglect).                                                                                                                                                                                                                           |    |                      |    |     |
| Posttraumatic Diagnostic Scale (PDS) <sup>60,61</sup>                           | The PDS is a self-reported measure that identifies high-risk individuals with PTSD during an evacuation situation.                                                                                                                                              | 3  | 4-point Likert scale | 0  | 9   |
| Visual Analogue Scale (VAS) <sup>62</sup>                                       | VAS assesses expectation to treatment.                                                                                                                                                                                                                          | 1  | -                    | 0  | 100 |
| General functioning scale of Family Assessment Device (GF-FAD) <sup>63,64</sup> | The FAD is a measure assessing family functioning.                                                                                                                                                                                                              | 12 | 4-point Likert scale | 12 | 48  |
| Help-seeking preferences <sup>65</sup>                                          | Help-seeking preferences measure attitudes to seek help for others.                                                                                                                                                                                             | 11 | 5-point Likert scale | 11 | 55  |
| Multidimensional Assessment of Interoceptive Awareness (MAIA) <sup>66,67</sup>  | MAIA assesses the relevant dimensions of bodily awareness. It consists of eight subscales (Noticing, Not-Distracting, Not-Worrying, Attention Regulation, Emotional Awareness, Self-Regulation, Body Listening, and Trusting)                                   | 32 | 6-point Likert scale | 0  | 5   |
| Barratt Impulsiveness Scale (BIS-11) <sup>68,69</sup>                           | BIS measures impulsivity scale. It consists of three subscales (attentional impulsiveness, attentional impulsiveness, and non-planning impulsiveness ).                                                                                                         | 30 | 4-point Likert scale | 30 | 120 |
| Maudsley Obsessional-Compulsive Inventory (MOCI) <sup>70,71</sup>               | MOCI is administered to assess obsessive-compulsive symptoms. A higher score indicates more severe level of obsessive-compulsive symptoms. It consists of five subscales (checking, washing, slowness repetition, doubting conscientiousness, and ruminations). | 30 | 2-point Likert scale | 0  | 30  |
| Autism Questionnaire (AQ) <sup>72,73</sup>                                      | AQ can use any of the dichotomous evaluations to measure autistic characteristics. The total score range is 0-50. It consists of five subscales (social skills, attention switching, attention to detail, communication, and imagination).                      | 50 | 4-point Likert scale | 0  | 50  |

|                                                                            |                                                                                                                                                                                                                                                                                                                                  |    |                      |        |     |
|----------------------------------------------------------------------------|----------------------------------------------------------------------------------------------------------------------------------------------------------------------------------------------------------------------------------------------------------------------------------------------------------------------------------|----|----------------------|--------|-----|
| Rosenberg Self-Esteem Scale (SES) <sup>74,75</sup>                         | SES measures global self-esteem related to overall feelings of self-worth or self-acceptance.                                                                                                                                                                                                                                    | 10 | 5-point Likert scale | 1      | 7   |
| Tri-axial Coping Scale (TAC24) <sup>76</sup>                               | TAC24 evaluates stress coping strategies. The scale consists of eight subscales (Planning, Information, Cognitive reappraisal, Catharsis, Abandonment, Responsibility shifting Cognitive distancing, and Distraction).<br>The strength of the therapeutic alliance was assessed using the WAI-SF. It consists of three subscales | 24 | 5-point Likert scale | 0      | 120 |
| Working Alliance Inventory (WAI-SF) <sup>77</sup>                          | (agreement on the task of treatment, agreement on the goal of treatment, and a bond between the therapist and patient).<br>Quality of life is measured using the EQ-5D-5L                                                                                                                                                        | 12 | 7-point Likert scale | 12     | 84  |
| EuroQol-5 Dimension (EQ-5D-5L) <sup>78,79</sup>                            | questionnaire. The EQ-5D-5L are scored from 0 (death) to 1 (in good health).                                                                                                                                                                                                                                                     | 5  | 5-point Likert scale | -0.025 | 1   |
| The Generalized Anxiety Disorder Assessment (GAD-7) <sup>80,81</sup>       | The presence and severity of general anxiety was assessed using the GAD-7.                                                                                                                                                                                                                                                       | 7  | 4-point Likert scale | 0      | 21  |
| Patient Health Questionnaire (PHQ-9) <sup>81,82</sup>                      | The presence and severity of symptoms of depression experienced in the previous 2 weeks was evaluated using the PHQ-9.                                                                                                                                                                                                           | 9  | 4-point Likert scale | 0      | 27  |
| Socioeconomic status (SES)                                                 | SES assesses educational history. It consists of three subscales (oneself, father, and mother)                                                                                                                                                                                                                                   | 2  | 7-point Likert scale | 1      | 7   |
| The World Health Organization- Five Well-Being Index (WHO-5) <sup>83</sup> | WHO-5 is a short self-reported measure of current mental wellbeing.                                                                                                                                                                                                                                                              | 5  | 6-point Likert scale | 0      | 25  |
| Stanford Sleepiness Scale (SSS) <sup>84</sup>                              | SSS assesses the subjective sleepiness levels during fMRI imaging.                                                                                                                                                                                                                                                               | 1  | 7-point Likert scale | 1      | 7   |
